# Supplementary material for: Survival Analysis of Multi-Omics Data Identifies Potential Prognostic Markers of Pancreatic Ductal Adenocarcinoma
Source: PubMed Central journal article supplement (PMC6659773; doi:10.3389/fgene.2019.00624), 2019-07-18
Supplement: DataSheet_1.pdf [file DataSheet_1.pdf]

## *Supplementary Material*

# **Survival analysis of multi-omics data identifies potential prognostic markers of pancreatic ductal adenocarcinoma**

**Nitish Kumar Mishra, Siddesh Southeikal, Chittibabu Guda\***

\* **Correspondence:** Corresponding Author: [babu.guda@unmc.edu](mailto:babu.guda@unmc.edu)

### **1 Supplementary Data**

Supplementary tables are available on FigShare.

**Table S2:** <https://figshare.com/s/2f2359bf82e3a8db118f>

**Table S3:** <https://figshare.com/s/90c7a4decd480006ab9f>

**Table S4:** <https://figshare.com/s/6033221610cca1fe4fb8>

**Table S5:** <https://figshare.com/s/e183e0a487f87bebc3a8>

**Table S6:** <https://figshare.com/s/205a5f6ecd86a81314d7>

**Table S7:** <https://figshare.com/s/083f83bb641bd4901ec1>

### **2 Supplementary Tables and Figures**

#### **2.1 Supplementary Tables**

**Table S1:** List of R/Bioconductor tools and database used in pancreatic ductal cancer data analysis.

| Resource                             | Source              | Identifier                                                                                                                                              |
|--------------------------------------|---------------------|---------------------------------------------------------------------------------------------------------------------------------------------------------|
| <b>Software and algorithms</b>       |                     |                                                                                                                                                         |
| R                                    | R core team         | <a href="https://www.r-project.org/">https://www.r-project.org/</a>                                                                                     |
| Bioconductor                         | Bioconductor        | <a href="https://www.bioconductor.org/">https://www.bioconductor.org/</a>                                                                               |
| TCGAbiolinks                         | Bioconductor        | <a href="https://github.com/BioinformaticsFMRP/TCGAbiolinks">https://github.com/BioinformaticsFMRP/TCGAbiolinks</a>                                     |
| BMIQ                                 | R program           | <a href="https://sourceforge.net/projects/bmiq/">https://sourceforge.net/projects/bmiq/</a>                                                             |
| Limma                                | Bioconductor        | <a href="https://bioconductor.org/packages/release/bioc/html/limma.html">https://bioconductor.org/packages/release/bioc/html/limma.html</a>             |
| ROCR                                 | R package           | <a href="https://rocr.bioinf.mpi-sb.mpg.de/">https://rocr.bioinf.mpi-sb.mpg.de/</a>                                                                     |
| Gtrelis                              | Bioconductor        | <a href="https://github.com/jokergoo/gtrelis">https://github.com/jokergoo/gtrelis</a>                                                                   |
| DMRcate                              | Bioconductor        | <a href="https://www.bioconductor.org/packages/release/bioc/html/DMRcate.html">https://www.bioconductor.org/packages/release/bioc/html/DMRcate.html</a> |
| DESeq2                               | Bioconductor        | <a href="https://www.bioconductor.org/packages/release/bioc/html/DESeq2.html">https://www.bioconductor.org/packages/release/bioc/html/DESeq2.html</a>   |
| clusterProfiler                      | Bioconductor        | <a href="https://github.com/GuangchuangYu/clusterProfiler">https://github.com/GuangchuangYu/clusterProfiler</a>                                         |
| missMethyl                           | Bioconductor        | <a href="https://bioconductor.org/packages/release/bioc/html/missMethyl.html">https://bioconductor.org/packages/release/bioc/html/missMethyl.html</a>   |
| Survival                             | R package           | <a href="https://cran.r-project.org/web/packages/survival/index.html">https://cran.r-project.org/web/packages/survival/index.html</a>                   |
| survMiner                            | R package           | <a href="https://cran.r-project.org/web/packages/survminer/index.html">https://cran.r-project.org/web/packages/survminer/index.html</a>                 |
| Impute                               | R package           | <a href="https://bioconductor.org/packages/release/bioc/html/impute.html">https://bioconductor.org/packages/release/bioc/html/impute.html</a>           |
| Gviz                                 | Bioconductor        | <a href="https://bioconductor.org/packages/release/bioc/html/Gviz.html">https://bioconductor.org/packages/release/bioc/html/Gviz.html</a>               |
| <b>Data</b>                          |                     |                                                                                                                                                         |
| GDC                                  | NCI                 | <a href="https://portal.gdc.cancer.gov/">https://portal.gdc.cancer.gov/</a>                                                                             |
| cBioPortal                           | Memorial Sloan      | <a href="http://www.cbioportal.org/">http://www.cbioportal.org/</a>                                                                                     |
| FireHose                             | Broad Institute     | <a href="https://gdac.broadinstitute.org/">https://gdac.broadinstitute.org/</a>                                                                         |
| Illumina 450k Methylation Annotation | Van Andel Institute | <a href="http://zwdzwd.github.io/InfiniumAnnotation">http://zwdzwd.github.io/InfiniumAnnotation</a>                                                     |

## 2.2 Supplementary Figures

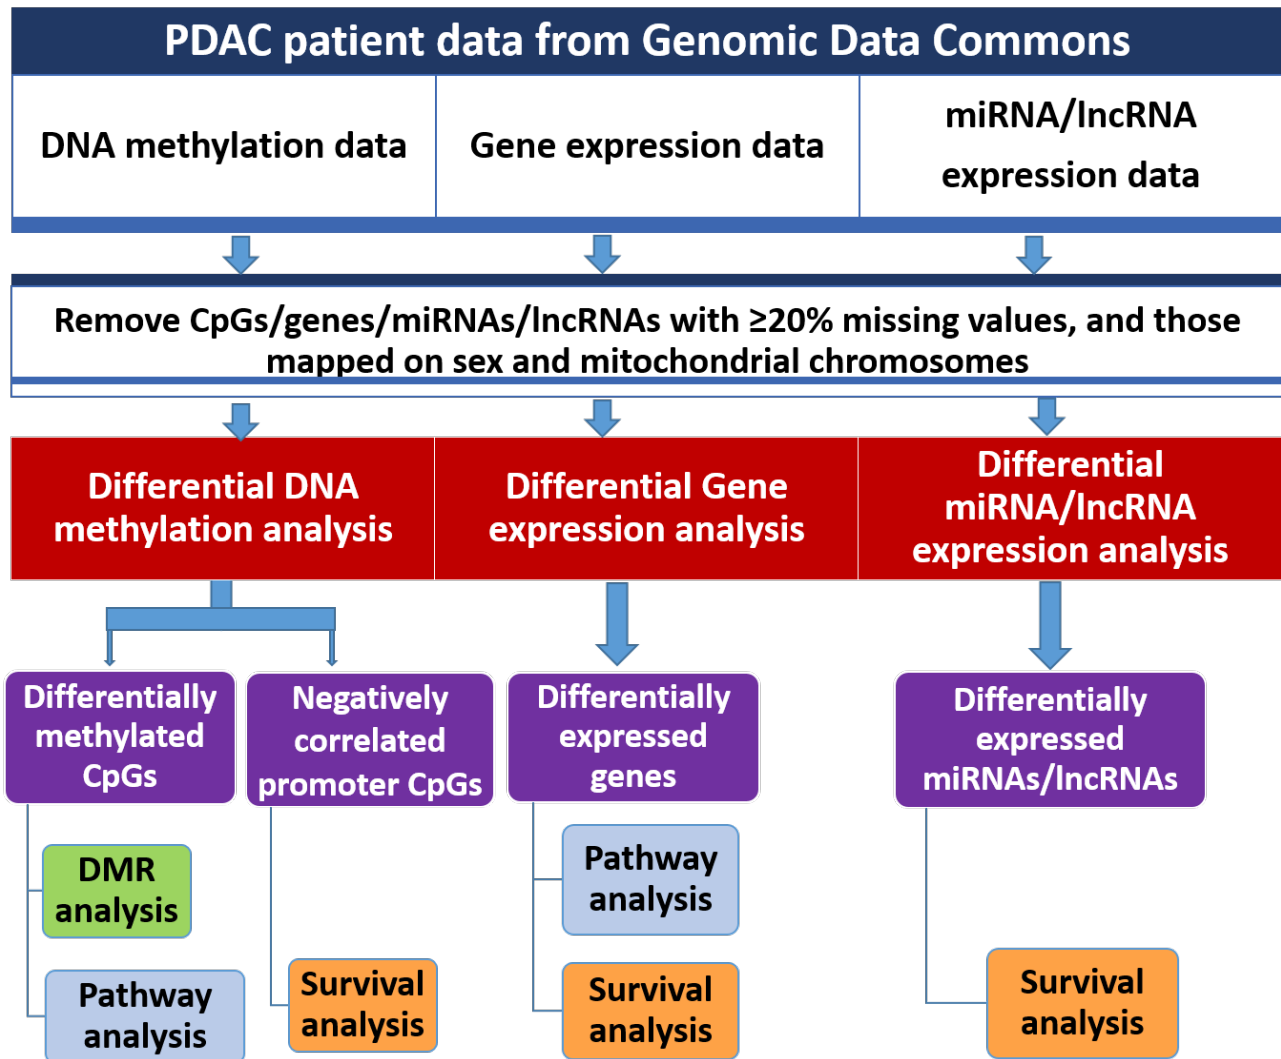

**Supplementary Figure 1.** Flowchart for the proposed methodology for TCGA pancreatic ductal adenocarcinoma data analysis.

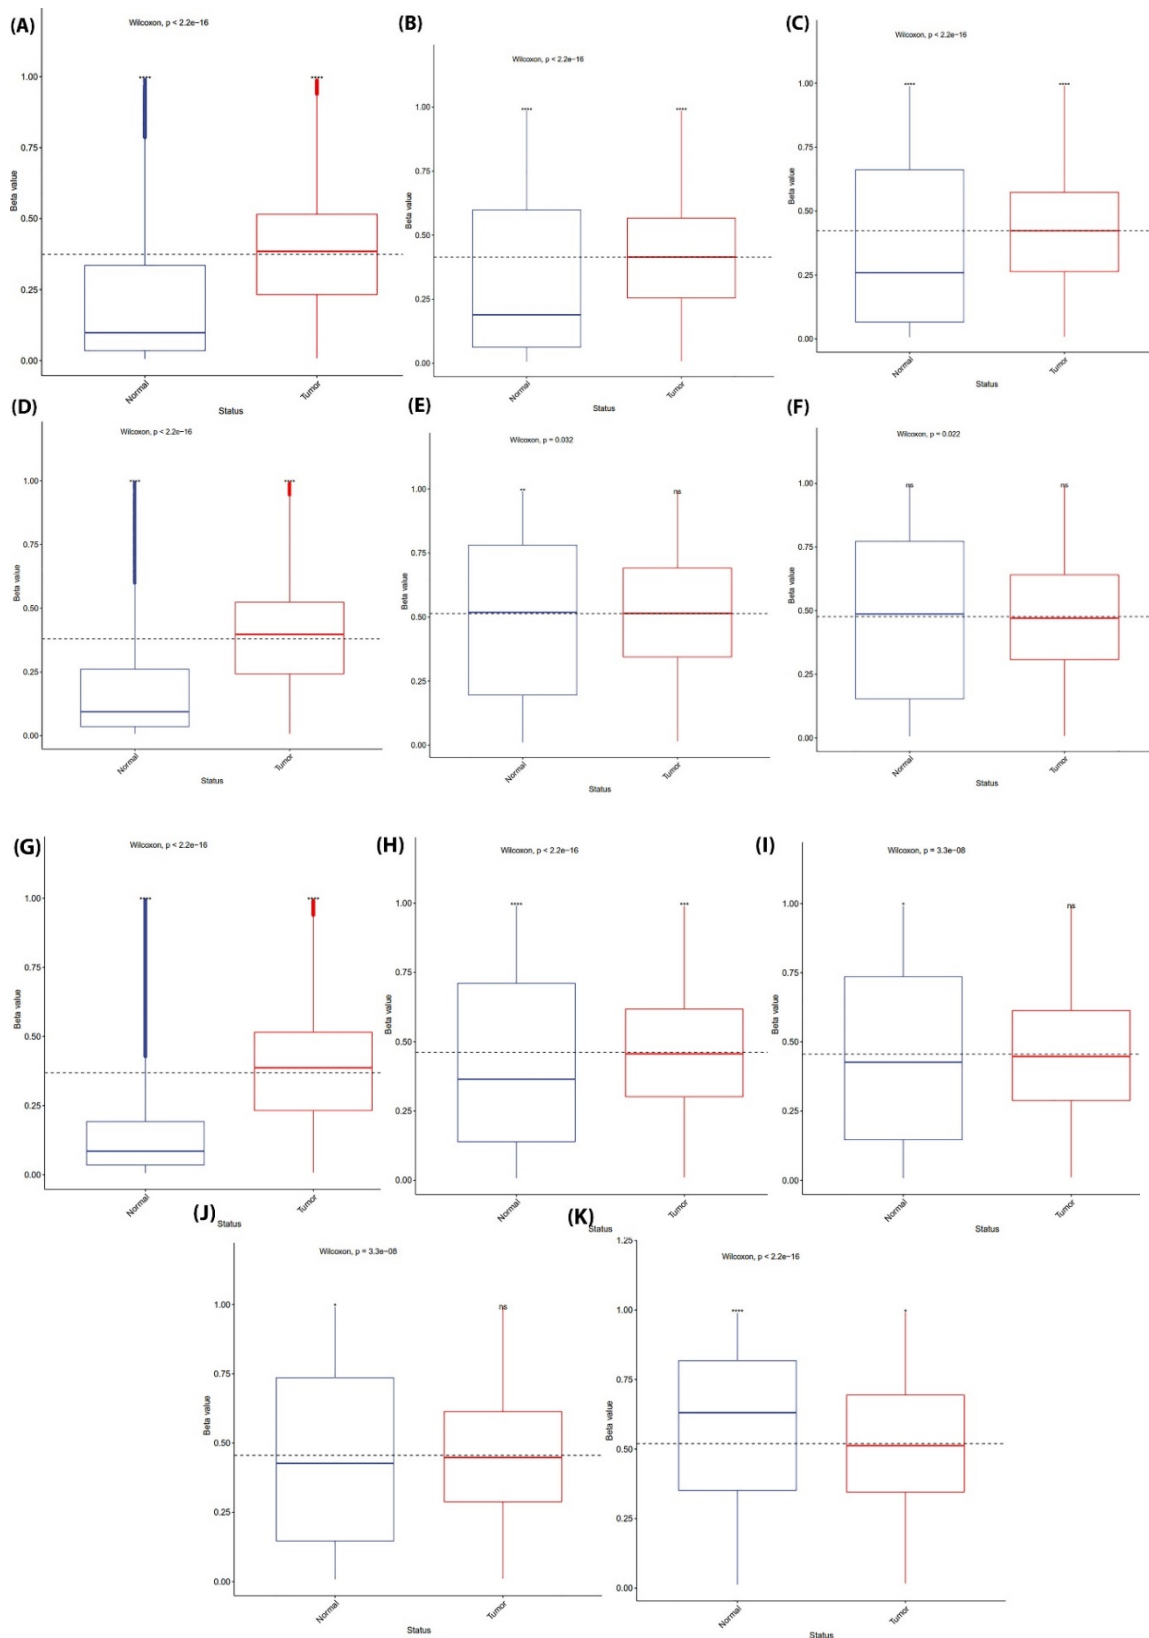

**Supplementary Figure 2.** DNA methylation distribution of tumor and normal samples in all genomic regions. Boxplot for- (A) TSS200 (B) TSS1500 (C) 5'UTR (D) 1<sup>ST</sup> Exon (E) Gene body (F) 3'UTR (G) CpG island (H) n-shore (I) s-shore (J) n-shelf (K) s-shelf

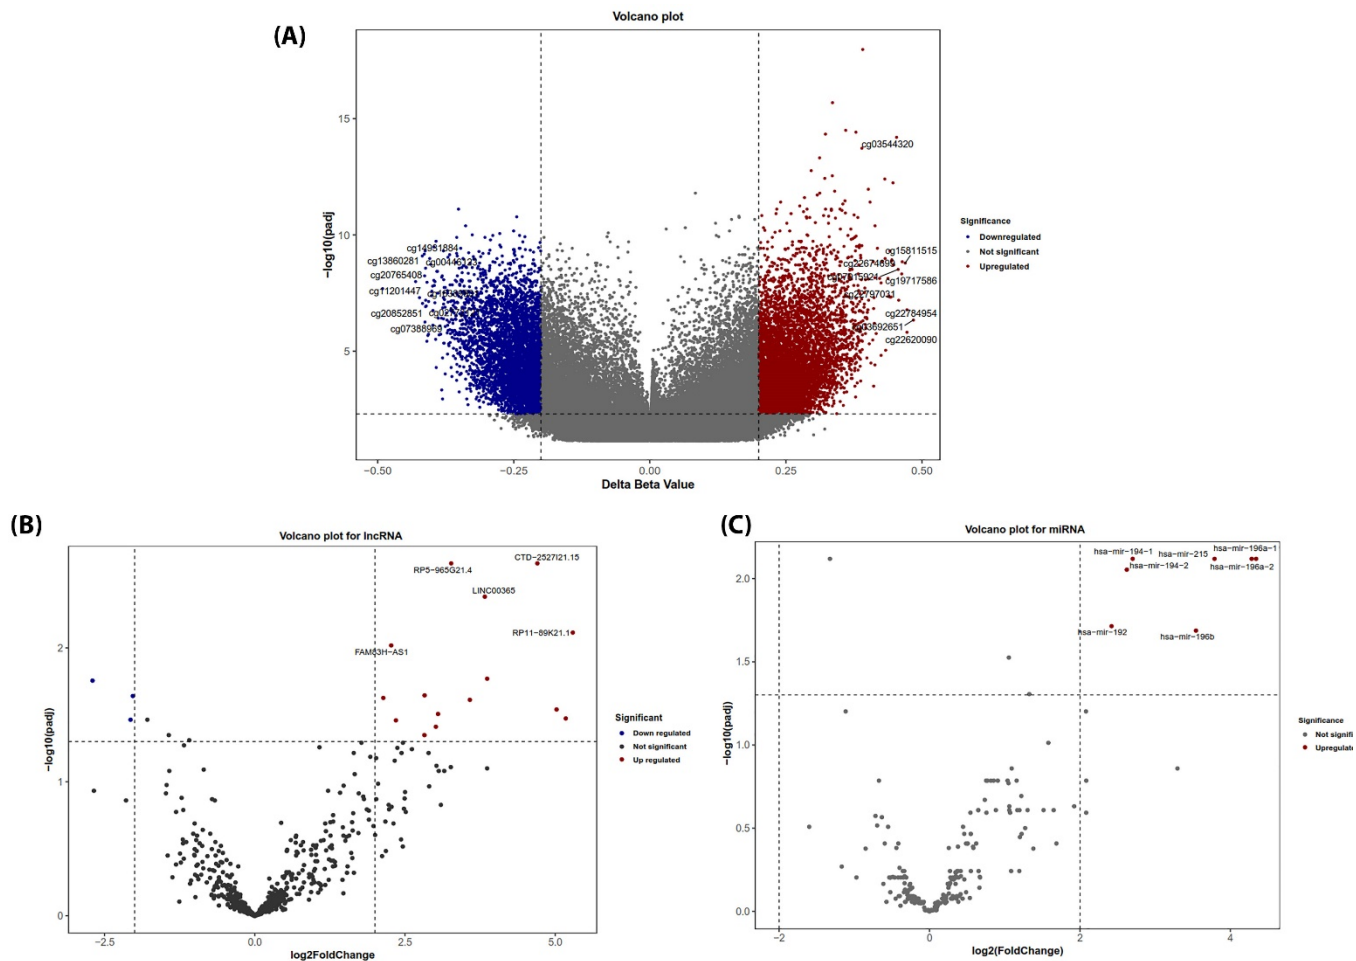

**Supplementary Figure 3.** Volcano plot for the differentially methylated CpGs, and differentially expressed lncRNA and miRNA. Genes/CpG which are in red and blue colors are highly upregulated and downregulated, respectively in PDAC. Vertical and horizontal dot line represents a cutoff point for log-fold-change p-value respectively

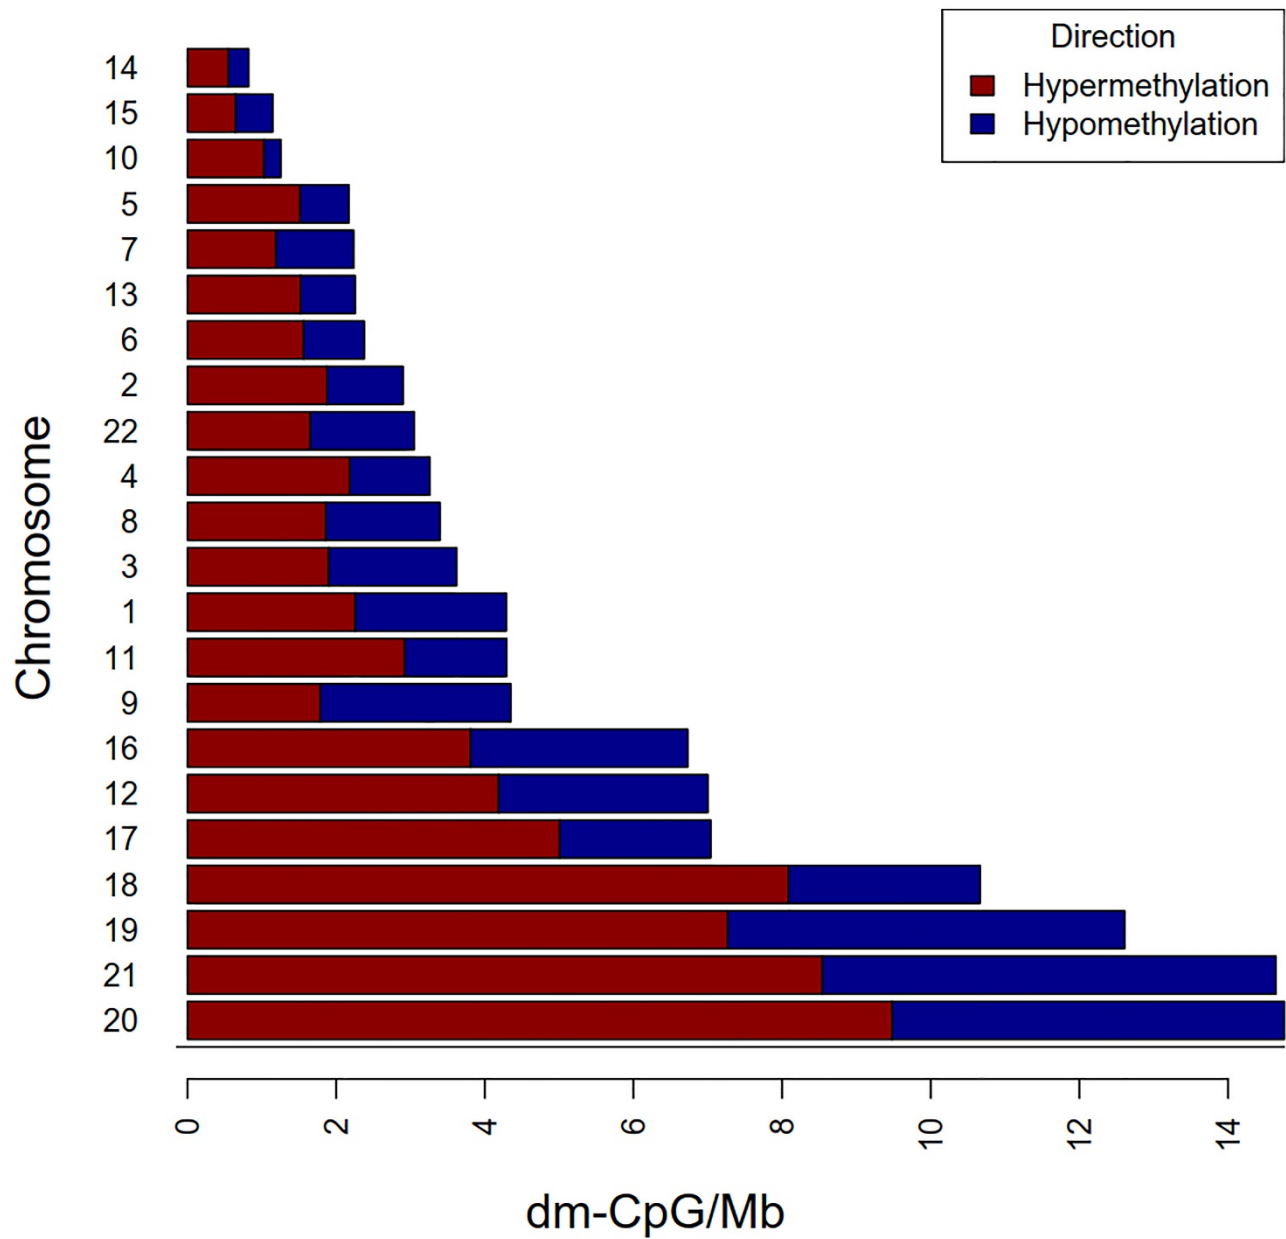

**Supplementary Figure 4.** Stacked barplot for differential hyper and hypomethylation frequencies for each chromosome. Chromosomes are sorted based on total differential methylation in per megabase pair length of the chromosomes.

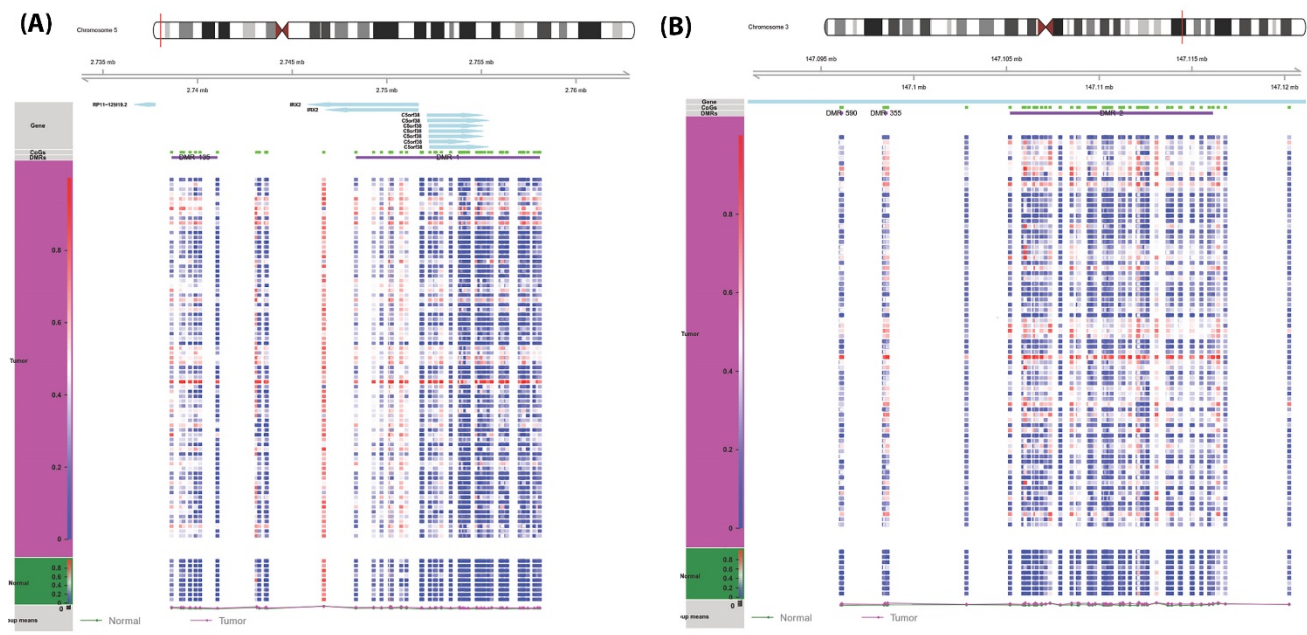

**Supplementary Figure 5.** *DMRcate* differentially methylated regions (DMRs). (A) DMR1 (B) DMR2

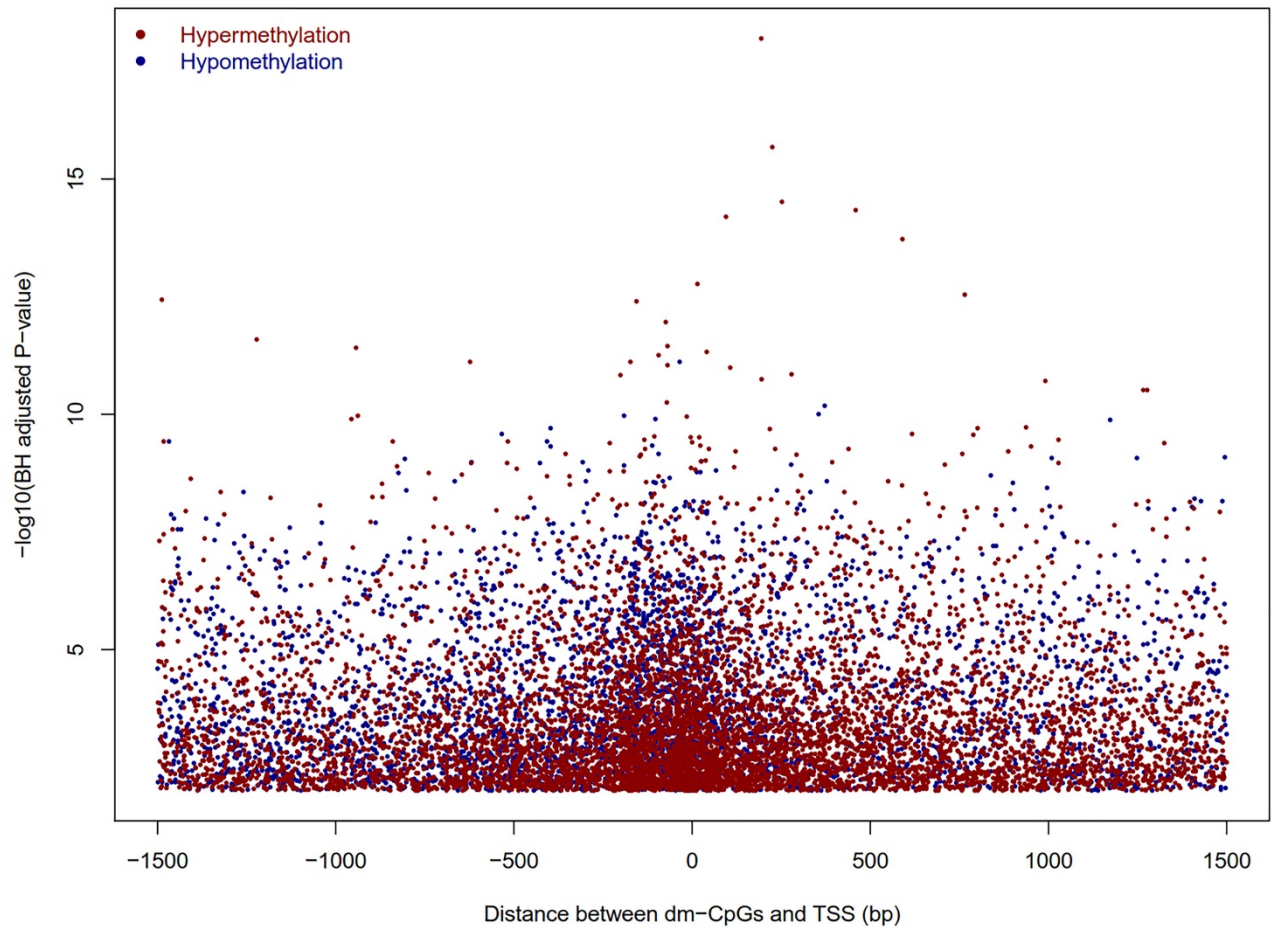

**Supplementary Figure 6.** CpG sites whose DNA methylation levels were significantly correlated with gene expression with Bonferroni corrected P-value  $< 0.005$
